# Supplementary material
Source: PubMed Central journal article supplement (PMC6527488)

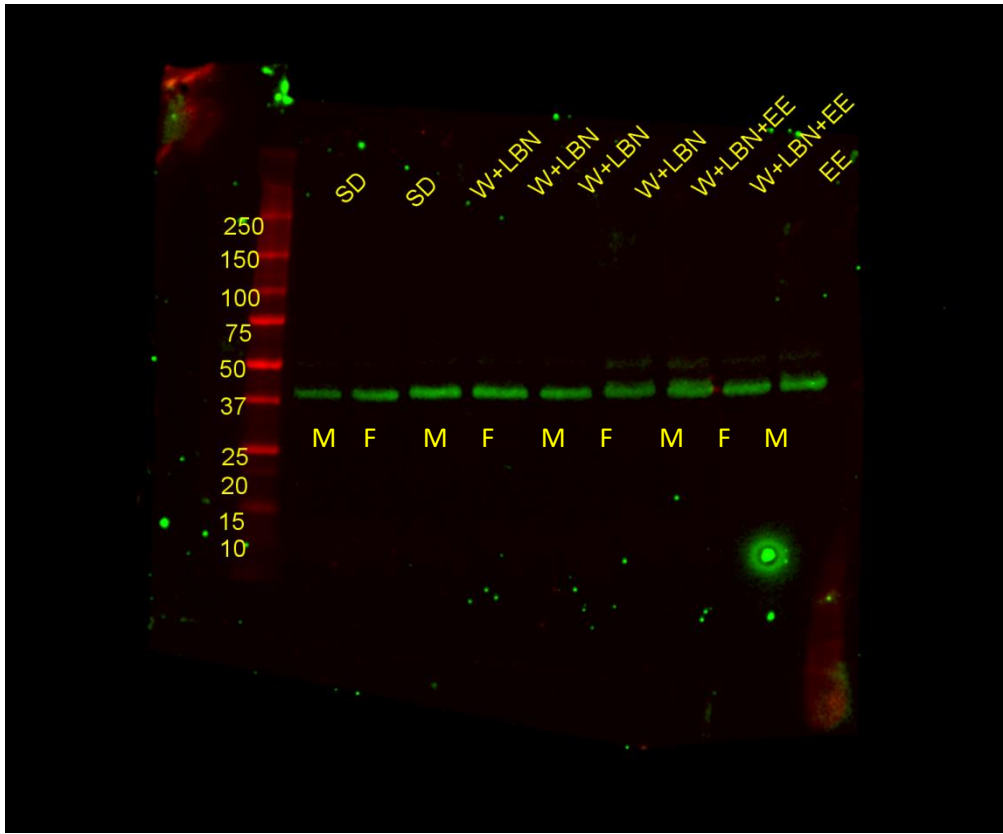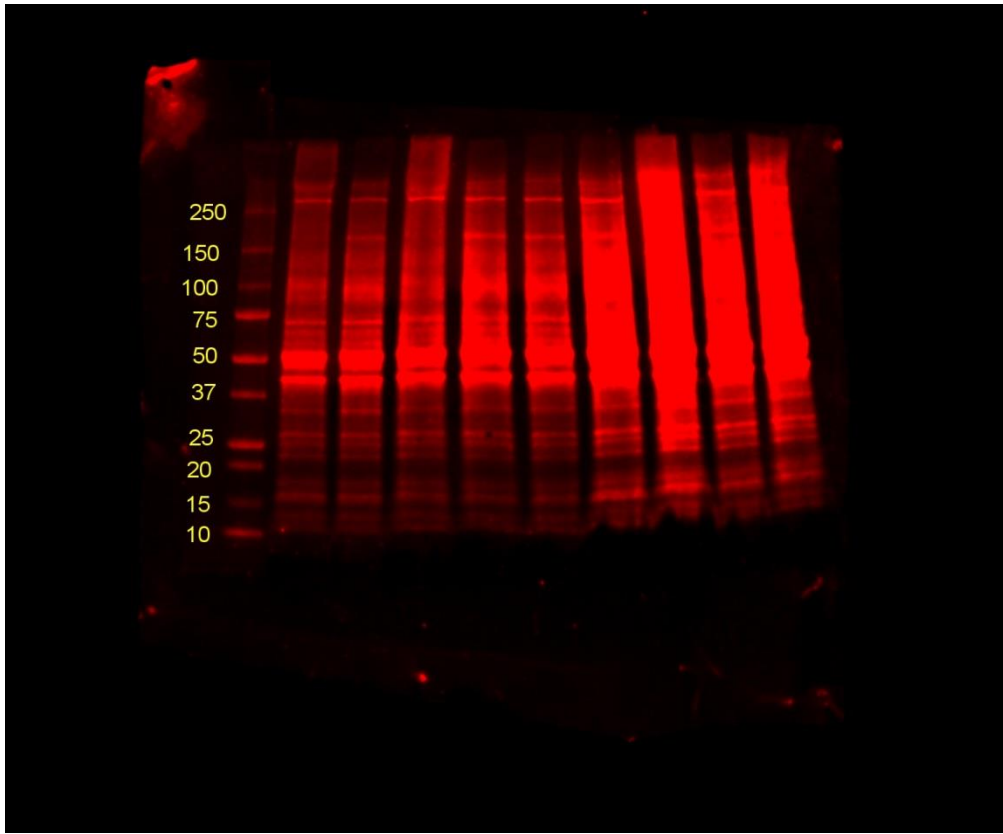

Supplement: NIHMS1522984-supplement-1.pdf [file NIHMS1522984-supplement-1.pdf]
